# Supplementary material for: Effects of SAHA and EGCG on Growth Potentiation of Triple-Negative Breast Cancer Cells
Source: PubMed Central journal article supplement (PMC6356328; doi:10.3390/cancers11010023), 2018-12-27

# Supplementary materials: Effects of SAHA and EGCG on Growth Potentiation of Triple-Negative Breast Cancer Cells

Kayla A. Lewis, Harrison R. Jordan and Trygve O. Tollefsbol

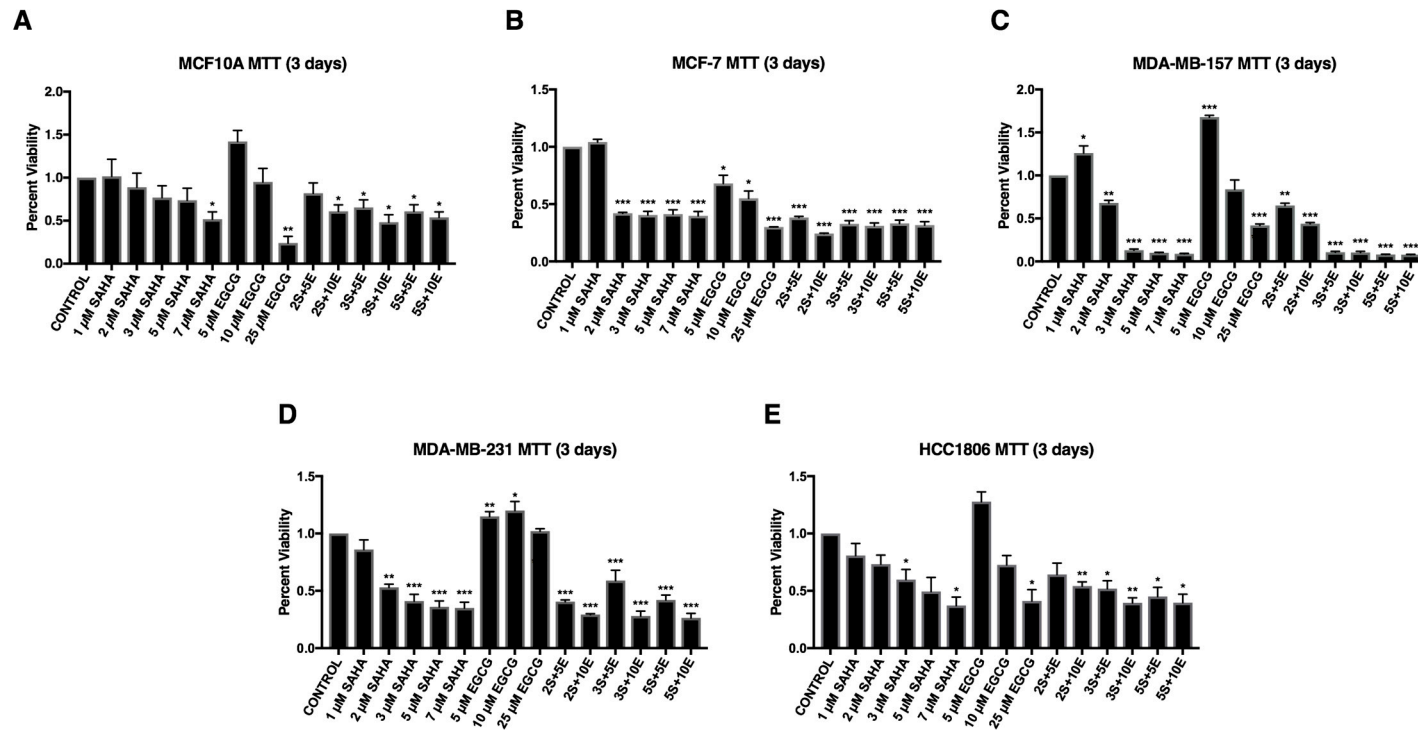

**Figure S1.** SAHA and EGCG significantly reduce cellular viability in three triple-negative and one ER-positive breast cancer cell lines. All cell lines were treated for 72 h with SAHA and EGCG, alone or in combination. There were no significant changes in cellular viability in the MCF10A non-cancerous control cells with low single doses of SAHA or EGCG (A). ER-positive MCF-7 cells (B) and all three triple-negative cell lines (C–E) experienced a reduced viability with the combination of SAHA and EGCG. We chose to proceed with 3 μM SAHA and 5 μM EGCG. Error bars represent standard error of the mean (SEM); \*  $p < 0.05$ , \*\*  $p < 0.01$ , \*\*\*  $p < 0.001$ .

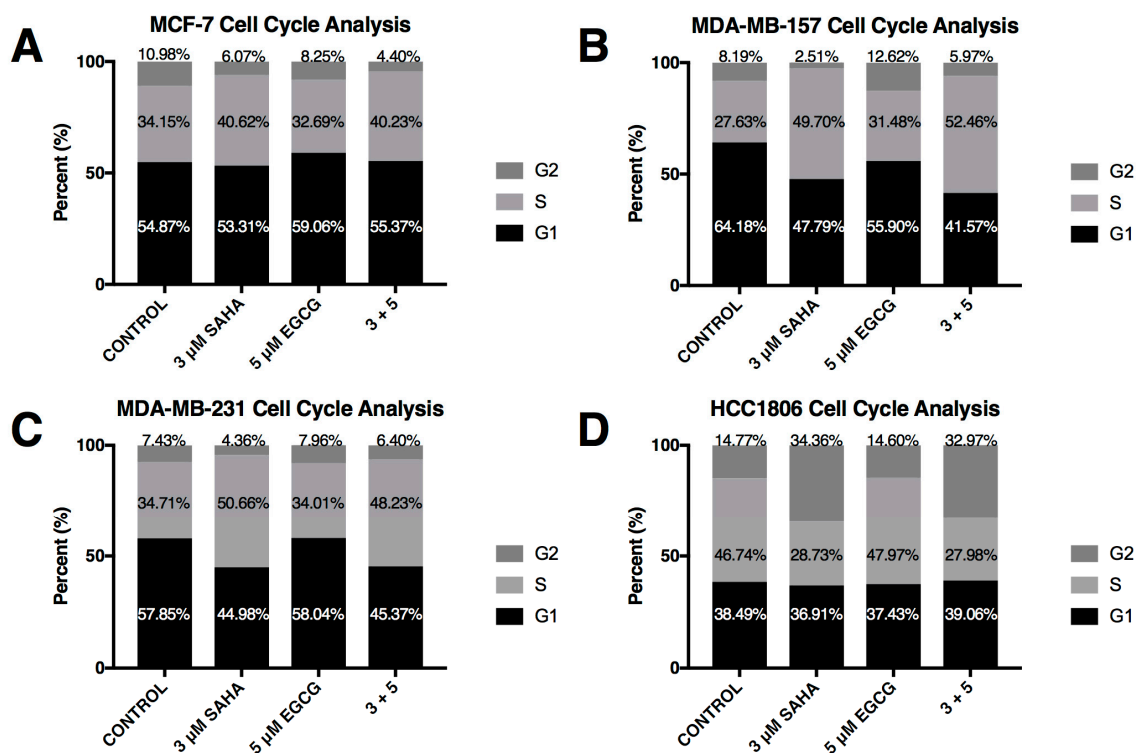

**Figure S2.** SAHA and EGCG increase G1/S phase in three of four breast cancer cell lines. **(A)** MCF-7 cells were treated with SAHA and/or EGCG for 72 h prior to FACS analysis. Cell cycle analysis was performed using propidium iodide in the MCF-7 cell line. **(B–D)** The same was done in the MDA-MB-157, MDA-MB-231, and the HCC1806 TNBC cell lines. All experiments were repeated three times. Error bars represent standard error of the mean (SEM); \*  $p < 0.05$ , \*\*  $p < 0.01$ , \*\*\*  $p < 0.001$ .

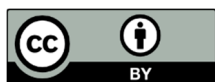

Supplement: cancers-11-00023-s001.pdf [file cancers-11-00023-s001.pdf]
